# Supplementary material for: One-step growth of needle and dendritic gold nanostructures on silicon for surface enhanced Raman scattering
Source: Royal Society of Chemistry journal article supplement (doi:10.1039/c1ce05912b), 2011-11-24
Supplement: c1ce05912b.pdf [file c1ce05912b.pdf]

## Supporting Information

### One-step growth of needle and dendritic gold nanostructures on silicon for surface enhanced Raman scattering

Abhishek Lahiri<sup>1</sup>, Rui Wen<sup>1</sup>, Surasak Kuimalee<sup>2</sup>, Shin-ichiro Kobayashi<sup>3</sup> and Hyonkook Park<sup>4</sup>

<sup>1</sup>WPI Research Center, Advanced Institute for Materials Research, Tohoku University, Katahira 2-1-1, Aobaku, Sendai 980-8577, Japan

<sup>2</sup>Department of Physics and Materials Science, Faculty of Science, Chiang Mai University, Chiang Mai 50200, Thailand

<sup>3</sup>Department of Applied Chemistry, Graduate School of Engineering, Tohoku University, 6-6-04 Aoba, Sendai 980-8579, Japan

<sup>4</sup>Electronics and Telecommunications Research Institute, Daejeon, Republic of Korea, Korea 305350

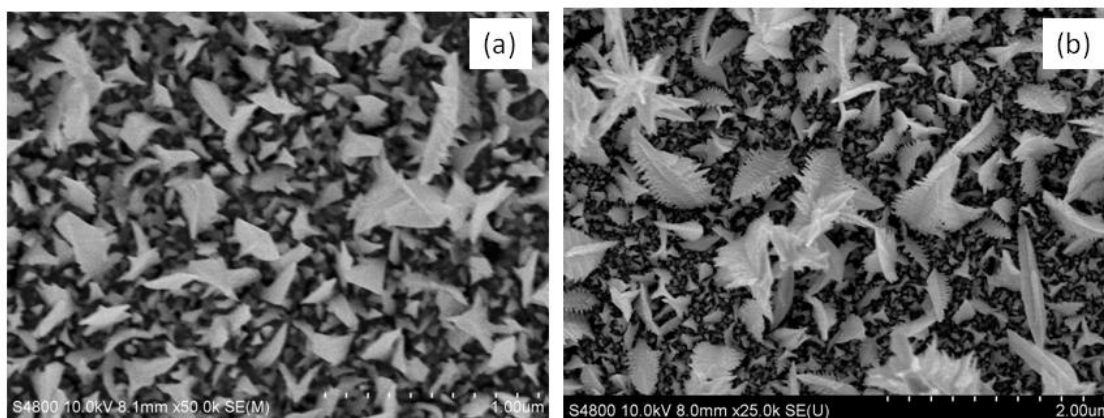

Figure S1 (a): Morphology of gold deposited on p-type silicon in presence of green laser. Irregular morphology with dendritic features is observed. (b) In presence of red laser wherein flat dendrites are observed
